# Supplementary material for: Terrain visibility impact on the preparation of landslide inventories: a practical example in Darjeeling district (India)
Source: Copernicus journal article supplement (doi:10.5194/nhess-22-2929-2022), 2022-09-06
Supplement: Supplementary file 1 [file nhess-22-2929-2022-supplement.pdf]

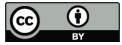

*Supplement of*

## **Terrain visibility impact on the preparation of landslide inventories: a practical example in Darjeeling district (India)**

**Txomin Bornaetxea et al.**

*Correspondence to:* Txomin Bornaetxea (txomin.bornaetxea@ehu.eus)

The copyright of individual parts of the supplement might differ from the article licence.

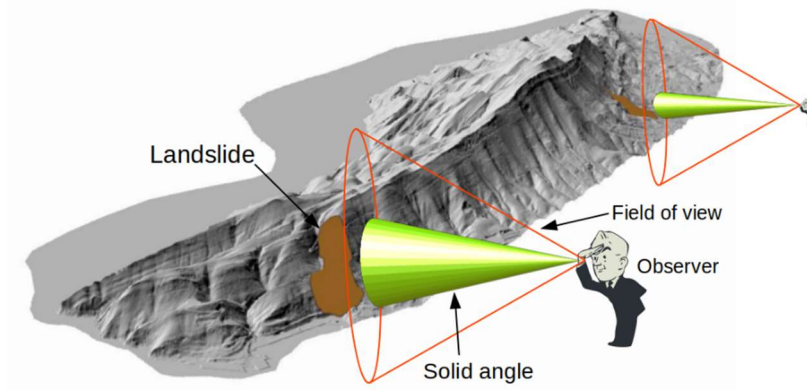

5 **Figure S1: Simplified sketch of the concept of the solid angle used to evaluate the Estimated Visibility (EV) of a landslide. The figure highlights that the solid angle depends on the distance between the observer and the landslide. The closer is the observer the larger is the portion of the field of view occupied by the landslide.**

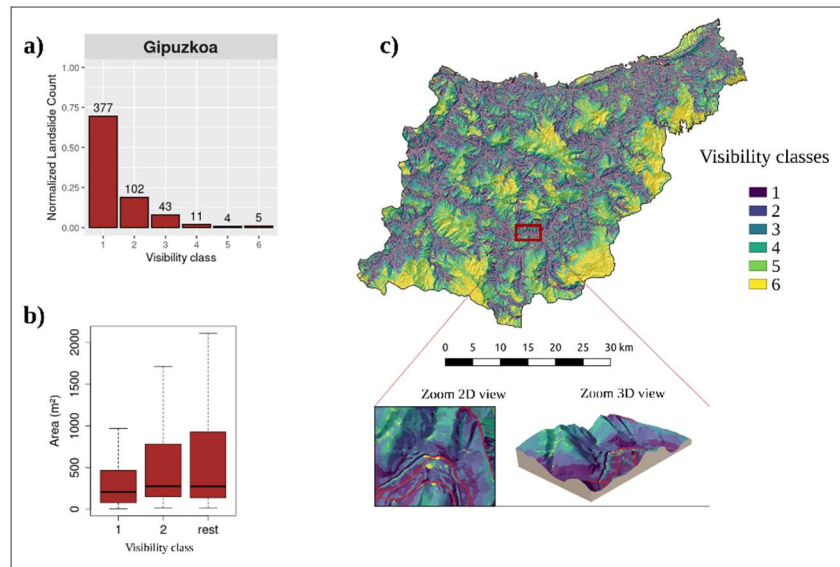

10 **Figure S2: Additional material concerning the analysis performed with the Gipuzkoa inventory. a) Normalized landslide count distribution plot for Gipuzkoa inventory. The values above each column signify the absolute number of landslides in each visibility class. b) Landslide area boxplots per SA classes in Gipuzkoa. Horizontal solid line, inside each box, indicates the median value. c) EV map for Gipuzkoa. Red lines in the zoom insets represent the roads used to simulate the observer position.**
